# Supplementary material for: Thermal energy in dry snow avalanches
Source: Copernicus journal article supplement (doi:10.5194/tc-9-1819-2015), 2015-09-17
Supplement: Supplementary file [file tc-9-1819-2015-supplement-title-page.pdf › tc-9-1819-2015-supplement-title-page.pdf]

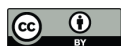

## *Supplement of*

# **Thermal energy in dry snow avalanches**

**W. Steinkogler et al.**

*Correspondence to:* W. Steinkogler (steinkogler@slf.ch)

- tc-9-1819-2015-supplement-title-page.pdf
- aval1EDIT2.wmv
- aval2EDIT.wmv

The copyright of individual parts of the supplement might differ from the CC-BY 3.0 licence.
